# Supplementary figures and images for: Citalopram exhibits immune-dependent anti-tumor effects by modulating C5aR1+ TAMs
Source: eLife journal article supplement (doi:10.7554/elife.103016), 2025-01-29

**Figure 1C**

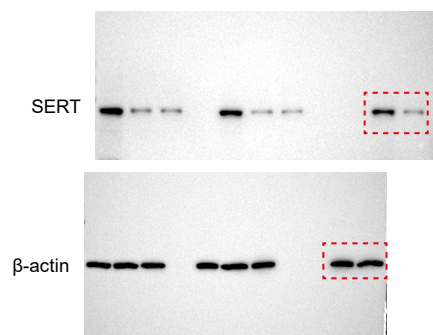

**Figure 1D**

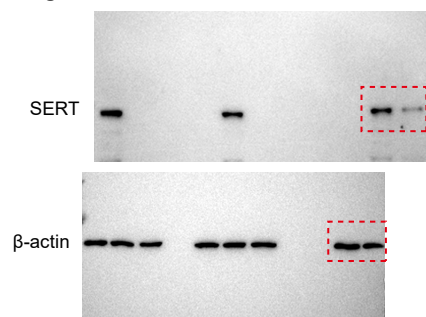

Supplement: fig1-data1 [file Figure 1_Source data 1.pdf › Figure 1_Source data 1/Figure 1_Source data 1.pdf]

Figure 2F

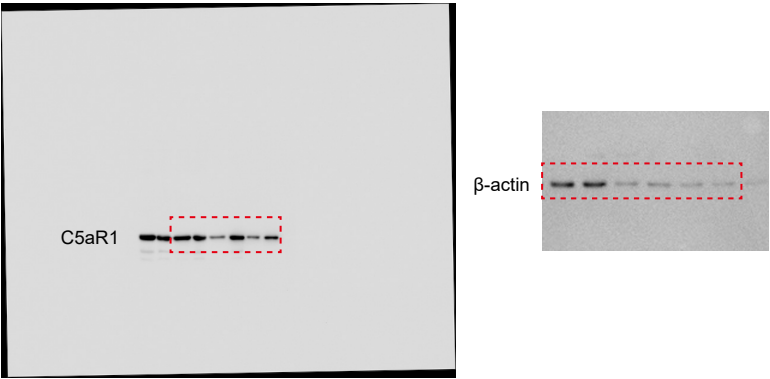

Figure 2G

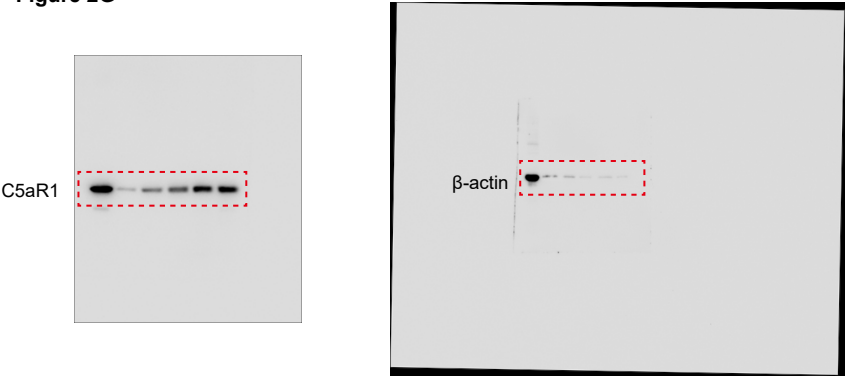

Figure 2J

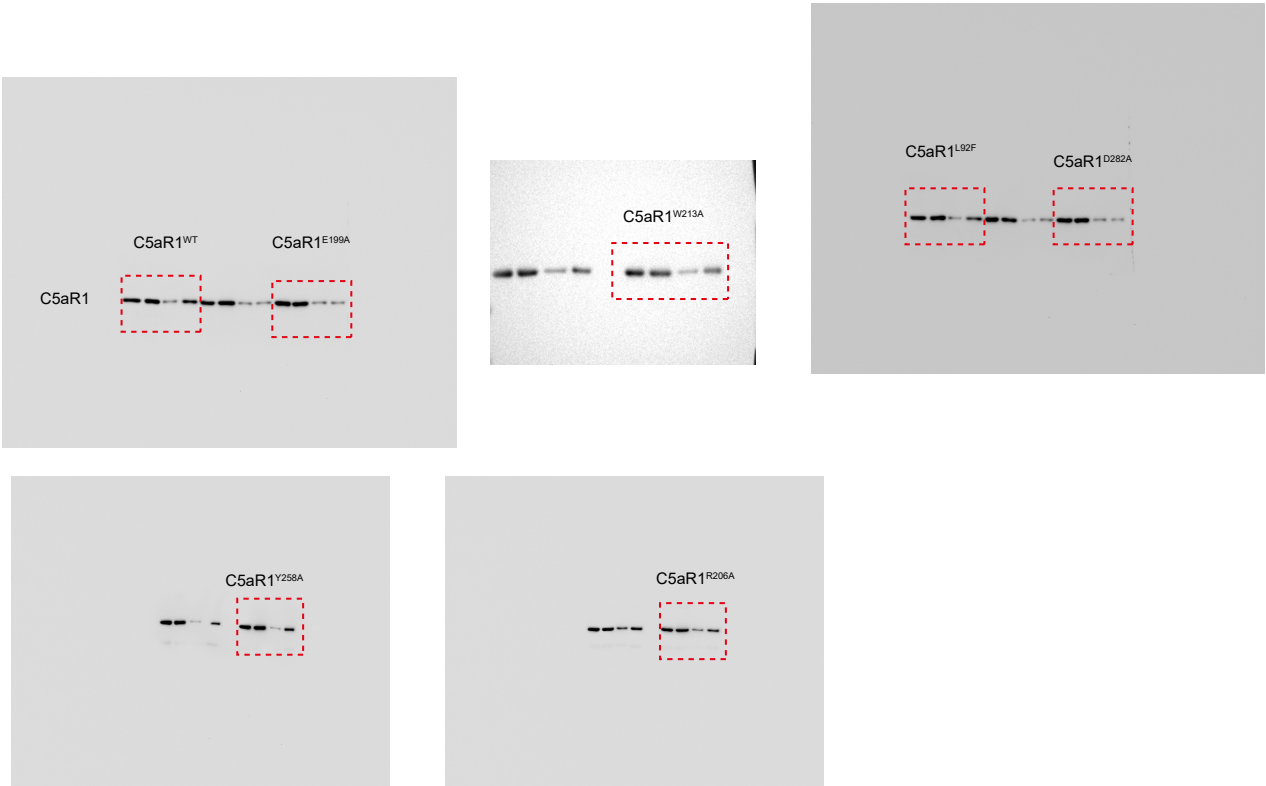

Supplement: fig2-data1 [file Figure 2_Source data 1.pdf › Figure 2_Source data 1/Figure 2_Source data 1.pdf]

Figure 2-figure supplement 2A

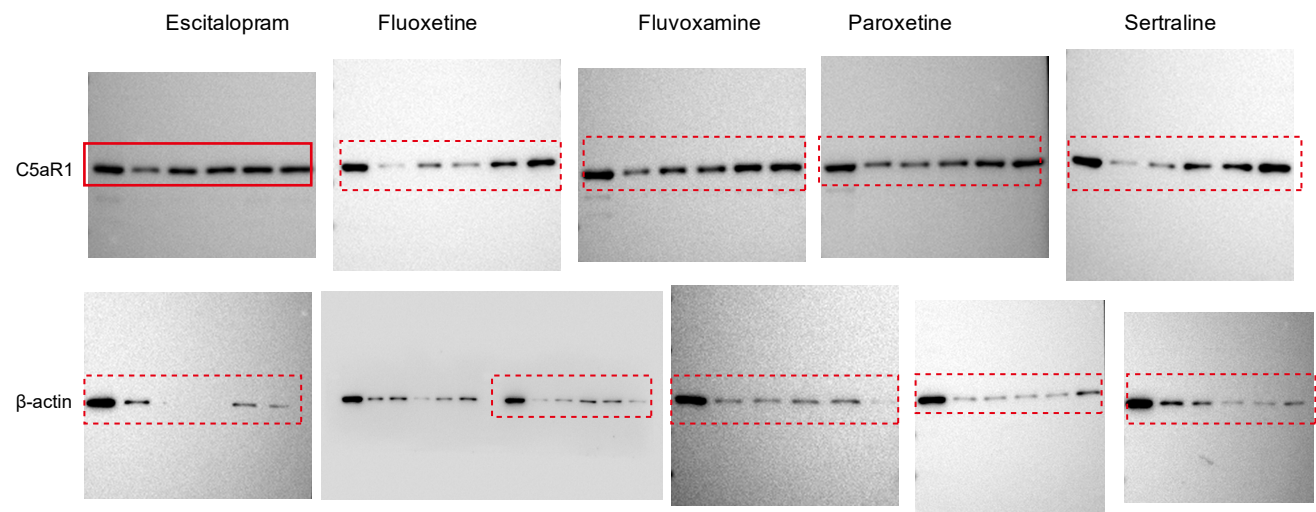

Figure 2-figure supplement 2E

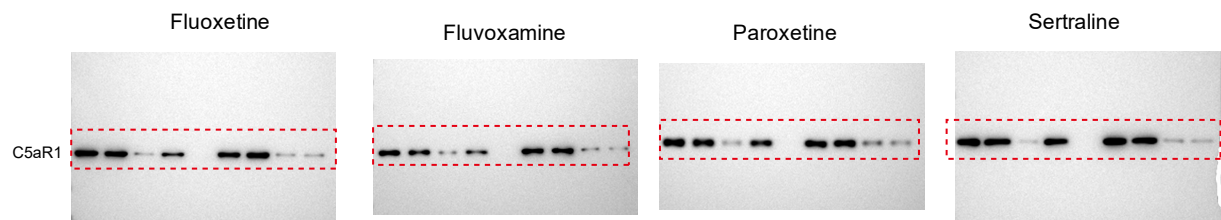

Supplement: fig2-figsupp2-data1 [file Figure 2-figure supplement 2_Source data 1.pdf › Figure 2-figure supplement 2_Source data 1/Figure 2-figure supplement 2_Source data 1.pdf]

**Figure 3A**

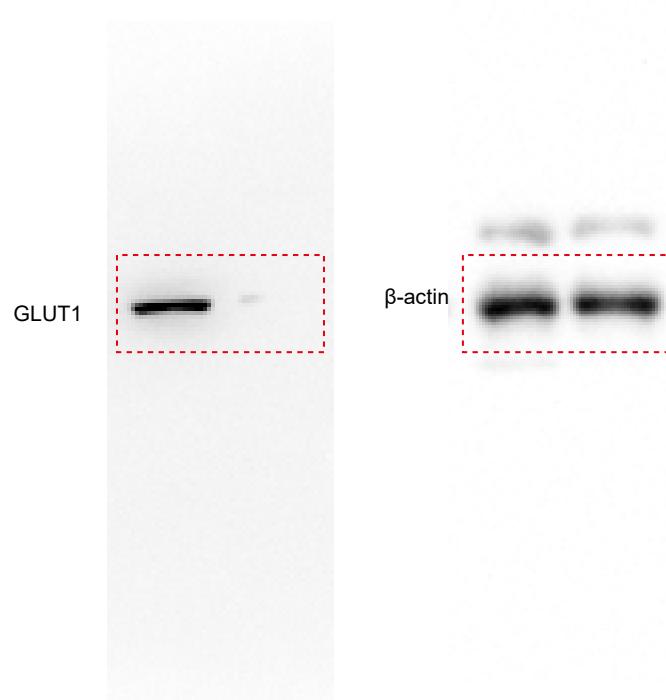

Supplement: fig3-data1 [file Figure 3_Source data 1.pdf › Figure 3_Source data 1/Figure 3_Source data 1.pdf]

Figure 3-figure supplement 2

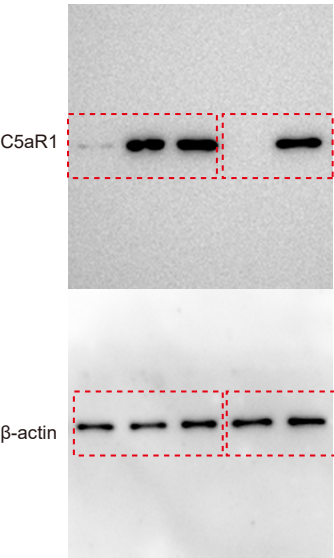

Supplement: fig3-figsupp2-data1 [file Figure 3-figure supplement 2.pdf › Figure 3-figure supplement 2_Source data 1/Figure 3-figure supplement 2.pdf]

Figure 3-figure supplement 4

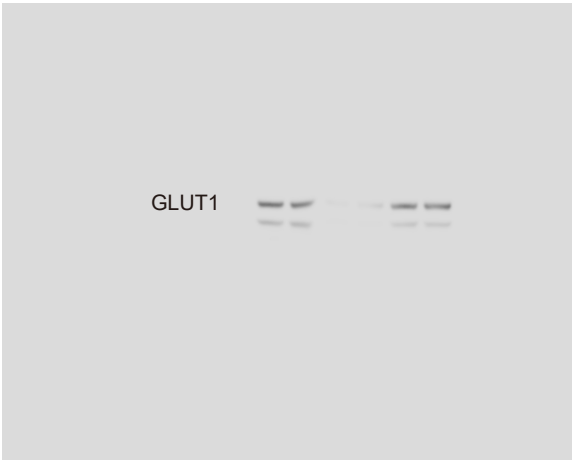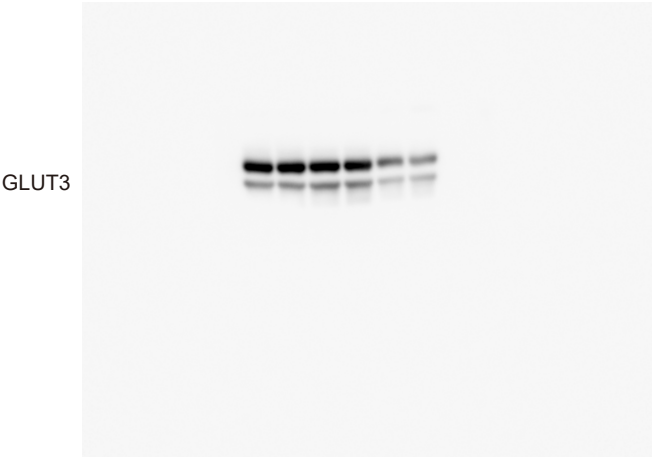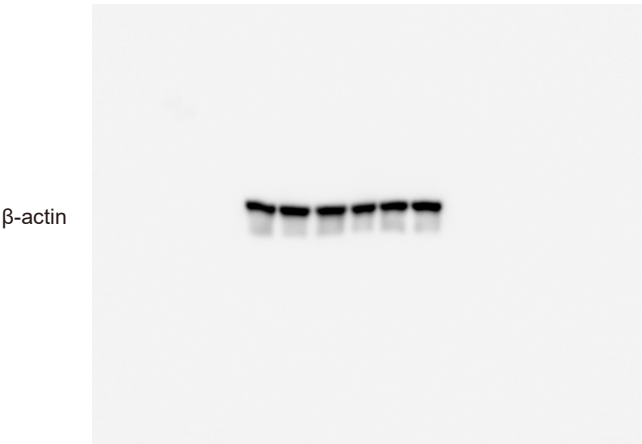

Supplement: fig3-figsupp4-data1 [file Figure 3-figure supplement 4.pdf › Figure 3-figure supplement 4_Source data 1/Figure 3-figure supplement 4.pdf]
